# Supplementary material
Source: Springer Nature journal article supplement (https://www.springermedizin.de/resource/supplementary/13063_2013_1534_MOESM4_ESM.pdf/9620226)
Supplement: MOESM4 [file 9620226]

# STOPIT -3

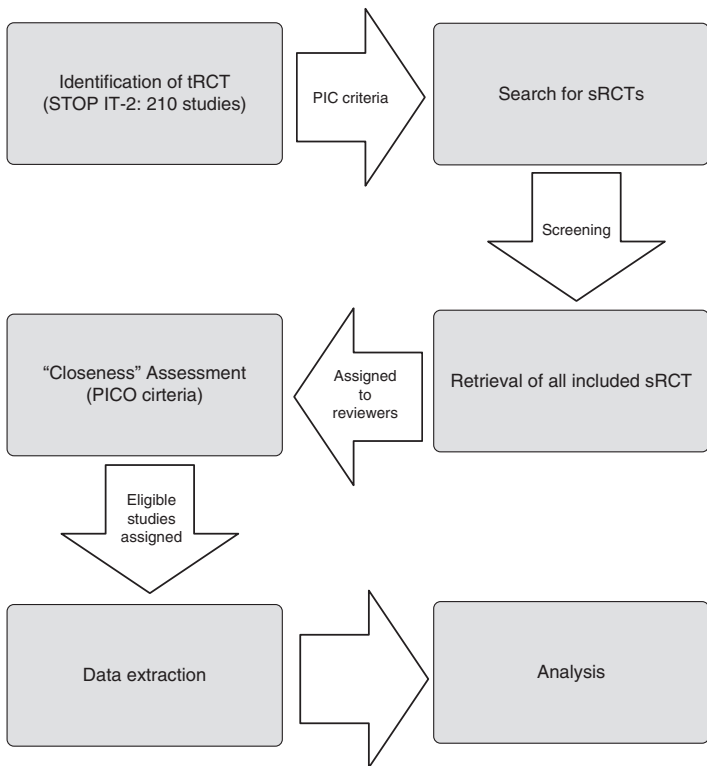

Flow chart of the Study of Trial Policy of Interim Truncation (STOPIT)- 3.

**Abbreviations.-** PIC: Patient population, intervention and control; PICO: Patient population, intervention, control and outcomes; sRCT: Subsequent randomized controlled trial; tRCT: Truncated randomized controlled trial
